# Supplementary material
Source: Springer Nature journal article supplement (https://www.springermedizin.de/resource/supplementary/12943_2013_1168_MOESM1_ESM.pdf/9552586)
Supplement: MOESM1 [file 9552586]

Additional file 1. 6-GeneSig subgroup classification rules

| <b>r-group</b> | <b>1</b>    | <b>2</b>    | <b>3</b>    | <b>4</b>   |
|----------------|-------------|-------------|-------------|------------|
| ALK            | below 0.2   | -1 to 1.5   | above 0.5   | below -0.5 |
| BIRC5          | 0 to -1     | above 0     | above 0     | below 0    |
| CCND1          | -0.4 to 1.6 | -0.4 to 1.6 | -0.4 to 1.6 | below -0.8 |
| MYCN           | below 0.5   | below 0.5   | above 0     | below -0.5 |
| NTRK1          | above >0.5  | 0 to 1.5    | below -0.5  | below 0.4  |
| PHOX2B         | above -0.3  | above -0.3  | above -0.3  | below 0    |

Rules based on standard deviations (SD) of expression values for all samples in each data set. In order for samples to be successfully assigned into one of four r-groups, 5 out of 6 expression rules must be met. Shaded cells indicate rules with no exception for classification into that specific subgroup.
